# Supplementary material for: Dipeptidyl-Peptidase 4 Inhibitor Sitagliptin Ameliorates Hepatic Insulin Resistance by Modulating Inflammation and Autophagy in ob/ob Mice
Source: Hindawi journal article supplement (doi:10.1155/2018/8309723), 2018-07-19
Supplement: f1 [file 8309723.f1.pdf]

## Supplementary Materials

Table S1. Primer sequences for qPCR analysis

| Target         | Direction | Sequence                      |
|----------------|-----------|-------------------------------|
| <i>Gapdh</i>   | Forward   | 5'GGTGAAGGTCGGTGTGAACG 3'     |
|                | Reverse   | 5'CTCGCTCCTGGAAGATGGTG 3'     |
| <i>Acc</i>     | Forward   | 5'TTTCTTCCTTCGCCTCCTTT 3'     |
|                | Reverse   | 5'GCCAATCTCATTTTCCTCCT 3'     |
| <i>Fas</i>     | Forward   | 5'AAATTCAGCCCGTTGGAGT 3'      |
|                | Reverse   | 5'AAGTTGCATCCACCCAAATC 3'     |
| <i>Srebplc</i> | Forward   | 5'GAGGCAGAGAGCAGAGATGG 3'     |
|                | Reverse   | 5'GACAAAGAGAAGAGCCAAGCA 3'    |
| <i>Cpt1a</i>   | Forward   | 5'TCAAGCCAGACGAAGAACATC 3'    |
|                | Reverse   | 5'TGGTAGGAGAGCAGCACCTT 3'     |
| <i>Acox1</i>   | Forward   | 5'ATCAAGAGAAGCGAGCCAGA 3'     |
|                | Reverse   | 5'CCGAGAAAGTGGAAGGCATA 3'     |
| <i>Cd68</i>    | Forward   | 5'CTTCGGGCCATGTTTCTCTT 3'     |
|                | Reverse   | 5'ATTGTCGTCTGCGGGTGAT 3'      |
| <i>F4/80</i>   | Forward   | 5'GCTGTGAGATTGTGGAAGCA 3'     |
|                | Reverse   | 5'GGCAAGACATACCAGGGAGA 3'     |
| <i>Cd11c</i>   | Forward   | 5'GGTGAAGGTCGGTGTGAACG 3'     |
|                | Reverse   | 5'CATCAGGGAGAACCGTGTG 3'      |
| <i>Cd206</i>   | Forward   | 5'TTCAGCTATTGGACGCGAGG 3'     |
|                | Reverse   | 5'GAATCTGACACCCAGCGGAA 3'     |
| <i>Atg7</i>    | Forward   | 5'ATGCCAGGACACCCTGTGAACTTC 3' |
|                | Reverse   | 5'ACATCATTGCAGAAGTAGCAGCCA 3' |
| <i>Beclin1</i> | Forward   | 5'AGCCTCTGAAACTGGACACG 3'     |
|                | Reverse   | 5'TAGCCTCTTCCTCCTGGGTCT 3'    |
